# Supplementary material for: Prevalence and correlates of intestinal schistosomiasis infection among school-aged children in North-Western Tanzania
Source: PubMed Central journal article supplement (PMC7001966; doi:10.1371/journal.pone.0228770), 2020-02-05
Supplement: pone.0228770.s001.pdf [file pone.0228770.s001.pdf]

# OPTIMIZATION OF SCHISTOSOMIASIS TREATMENT IN TANZANIA

## CONFIDENTIAL CASE RECORD FORM

STUDY SITE: PRIMARY SCHOOL .....DISTRICT: ....., TANZANIA

SUBJECT NAME: .....

SUBJECT SCREENING ID: .....

SUBJECT STUDY ID: .....

### SCREENING VISIT:

Date interviewed for screening (dd/mm/yy): ...../...../.....

| Criteria for screening – please tick the appropriate boxes:                                                |                            |                            |
|------------------------------------------------------------------------------------------------------------|----------------------------|----------------------------|
| 1) Signed Informed Consent form (Parent, Guardian, or child)<br>Consent date (dd/mm/yy): ...../...../..... | <input type="checkbox"/> Y | <input type="checkbox"/> N |
| 2) Able and willing to be followed-up for 2 months                                                         | <input type="checkbox"/> Y | <input type="checkbox"/> N |
| 3) Age: 6 -18 years                                                                                        | <input type="checkbox"/> Y | <input type="checkbox"/> N |

**If both answers are YES, proceed:**

### DEMOGRAPHICS

|                 |                                                            |
|-----------------|------------------------------------------------------------|
| Age: ____ years | Sex: <input type="checkbox"/> M <input type="checkbox"/> F |
| School: ____    | Class/Grade: ____                                          |

### Inclusion criteria for screening – please tick the appropriate boxes:

**If all answers are YES, proceed:**

- |                                                                |                            |                            |
|----------------------------------------------------------------|----------------------------|----------------------------|
| 5) Experiencing a severe concurrent medical condition e.g. SCD | <input type="checkbox"/> Y | <input type="checkbox"/> N |
| 6) History of praziquantel use within previous 6 months        | <input type="checkbox"/> Y | <input type="checkbox"/> N |
| 7) Have diarrhea at time of the first sampling                 | <input type="checkbox"/> Y | <input type="checkbox"/> N |

**If all answers are NO, proceed:**

## OPTIMIZATION OF SCHISTOSOMIASIS TREATMENT IN TANZANIA

### SAMPLE COLLECTION AND RESULTS AT SCREENING.

| Stools exams                                                                                                                                                                                                         | <input type="checkbox"/> Yes | <input type="checkbox"/> No | NA <input type="checkbox"/> |
|----------------------------------------------------------------------------------------------------------------------------------------------------------------------------------------------------------------------|------------------------------|-----------------------------|-----------------------------|
| Date of stool sample collection (dd/mm/yy) : ___/___/___                                                                                                                                                             |                              |                             |                             |
| Consistency of stools: <input type="checkbox"/> formed <input type="checkbox"/> soft <input type="checkbox"/> loose <input type="checkbox"/> watery<br><input type="checkbox"/> blood <input type="checkbox"/> mucus |                              |                             |                             |
| Result of parasitological exam for <i>S. Mansoni</i> (Kato Katz):<br>Slide 1: _____ eggs; Slide 2: _____ eggs; Slide 3: _____ eggs; Slide 4: _____ eggs                                                              |                              |                             |                             |
| Result of parasitological exam for <i>Hookworm</i> (Kato Katz):<br>Slide 1: _____ eggs; Slide 2: _____ eggs; Slide 3: _____ eggs; Slide 4: _____ eggs                                                                |                              |                             |                             |
| Result of parasitological exam for <i>A.lumbricoides</i> (Kato Katz):<br>Slide 1: _____ eggs; Slide 2: _____ eggs; Slide 3: _____ eggs; Slide 4: _____ eggs                                                          |                              |                             |                             |
| Result of parasitological exam for <i>T.trichiura</i> (Kato Katz):<br>Slide 1: _____ eggs; Slide 2: _____ eggs; Slide 3: _____ eggs; Slide 4: _____ eggs                                                             |                              |                             |                             |
| Egg count ( <i>S.mansoni</i> ) at screening: _____ eggs= _____eggs/gram of stool                                                                                                                                     |                              |                             |                             |
| Infection intensity: Light <input type="checkbox"/> moderate <input type="checkbox"/> Heavy <input type="checkbox"/>                                                                                                 |                              |                             |                             |
| <b>Quality control (on 10% of slides)</b><br><i>To be completed by the senior lab technician</i><br><br><b>Egg count at screening: _____ eggs= _____eggs/gram of stool</b>                                           |                              |                             |                             |

| Urine exams                                                                                                                                                                                                                 | <input type="checkbox"/> Yes | <input type="checkbox"/> No | NA <input type="checkbox"/> |
|-----------------------------------------------------------------------------------------------------------------------------------------------------------------------------------------------------------------------------|------------------------------|-----------------------------|-----------------------------|
| Date of urine sample collection (dd/mm/yy) : ___/___/___                                                                                                                                                                    |                              |                             |                             |
| Consistency/colouration of urine: <input type="checkbox"/> turbidity <input type="checkbox"/> Reddish brown <input type="checkbox"/> bloody<br><input type="checkbox"/> yellowish <input type="checkbox"/> clear/colourless |                              |                             |                             |
| Result of parasitological exam (urine filtration):<br>Slide 1: _____ eggs; Slide 2: _____ eggs; Slide 3: _____ eggs;<br>Slide 4: _____ eggs                                                                                 |                              |                             |                             |
| Egg count ( <i>S.haematobium</i> ) at screening: _____ eggs= _____eggs/per 10mls of urine                                                                                                                                   |                              |                             |                             |
| Infection intensity: Light <input type="checkbox"/> moderate <input type="checkbox"/> Heavy <input type="checkbox"/>                                                                                                        |                              |                             |                             |

# OPTIMIZATION OF SCHISTOSOMIASIS TREATMENT IN TANZANIA

*Quality control (on 10% of slides)*

*To be completed by the senior lab technician*

**Egg count at screening: \_\_\_\_\_ eggs= \_\_\_\_\_ eggs/per 10mls of urine**

**Is urine been kept for miracidia collection?    Yes    No**

Is the patient eligible for enrolment?    Yes    No

\_\_\_\_\_  
Study team person signature

Date (dd/mm/yy): .....

# OPTIMIZATION OF SCHISTOSOMIASIS TREATMENT IN TANZANIA

## CONFIDENTIAL CASE RECORD FORM

STUDY SITE: PRIMARY SCHOOL .....DISTRICT: ....., TANZANIA

SUBJECT NAME: .....

SUBJECT SCREENING ID: .....

SUBJECT STUDY ID: .....

SCREENING VISIT: CLINICAL SYMPTOMS, MALARIA, HAEMOGLOBIN CONCENTRATION  
ANTHROPOMETRIC MEASUREMENTS

Date interviewed for screening (dd/mm/yy): ...../...../.....

### PATIENT INFORMATION:

WEIGHT

HEIGHT

Any history of using antimalarial in the past 2 weeks

YES  NO

Any history of one of the following symptoms in the past 3 days

FEVER: YES  NO

HEADACHE: YES  NO

VOMITING: YES  NO

FATIGUE: YES  NO

Haemoglobin level

Blood slide for malaria parasite taken YES  NO

RESULTS: .....
